# Supplementary material
Source: MDPI journal article supplement (https://www.mdpi.com/1999-4893/12/8/174)
Supplement: s1 [file s1]

# A Novel Blind Restoration and Reconstruction Approach for CT Images based on Sparse Representation and Hierarchical Bayesian-MAP

Yunshan Sun <sup>1</sup>, Liyi Zhang <sup>2</sup>, Yanqin Li <sup>1,\*</sup> and Juan Meng <sup>1</sup>

<sup>1</sup> School of Information Engineering, Tianjin University of Commerce, Tianjin 300134, China

<sup>2</sup> School of Electrical Automation and Information Engineering, Tianjin University, Tianjin 300072, China

\* Correspondence: [liyanqin-2190@126.com](mailto:liyanqin-2190@126.com)

This supplementary material shows additional experimental results of applying the SART, SART + TV and Wavelet methods for solving computed tomography image reconstruction problems.

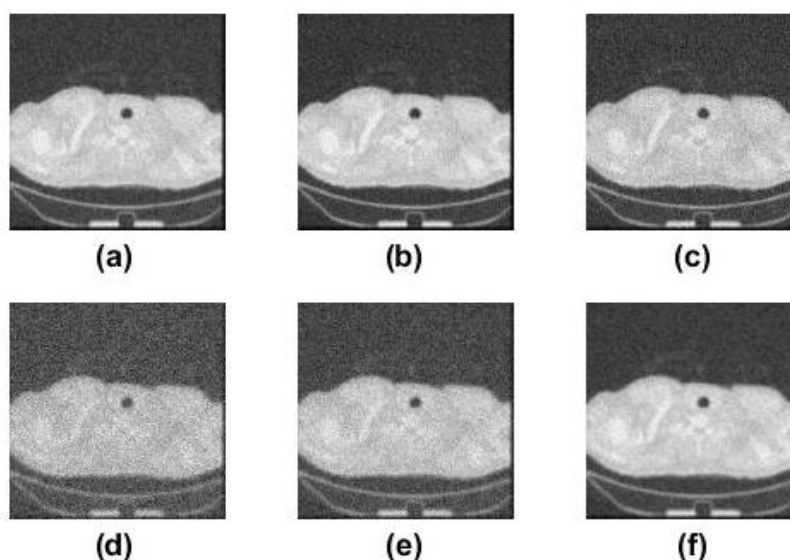

**Figure S1.** Experimental images and results of the first CT image. The 1st row shows the SART method results for 60%, 80% and 100% of measurements, respectively, from left to right (SNR = 40 dB); the 2nd row shows SART method results for 60%, 80% and 100% of measurements, respectively, from left to right (SNR = 20 dB). (a) the reconstruction result (SNR = 40 dB, Sampling ratio=60%); (b) the reconstruction result (SNR = 40 dB, Sampling ratio = 80%); (c) the reconstruction result (SNR = 40 dB, Sampling ratio = 100%); (d) the reconstruction result (SNR = 20 dB, Sampling ratio = 60%); (e) the reconstruction result (SNR = 20 dB, Sampling ratio = 80%); (f) the reconstruction result (SNR = 20 dB, Sampling ratio = 100%).

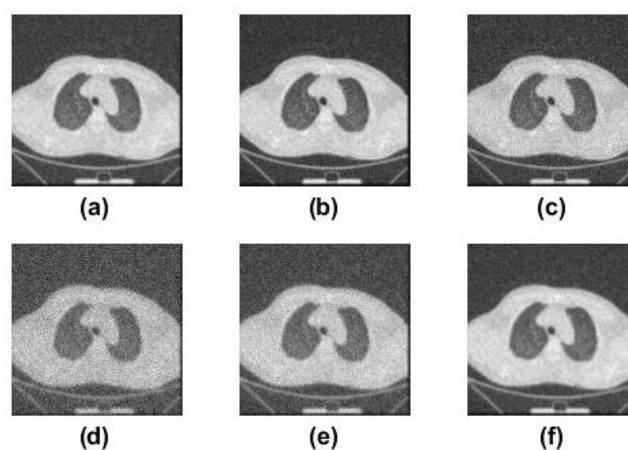

**Figure S2.** Experimental images and results of the second CT image. The 1st row shows the SART method results for 60%, 80% and 100% of measurements, respectively, from left to right (SNR = 40 dB); the 2nd row shows SART method results for 60%, 80% and 100% of measurements, respectively, from left to right (SNR = 20 dB). (a) the reconstruction result (SNR = 40 dB, Sampling ratio = 60%); (b) the reconstruction result (SNR = 40 dB, Sampling ratio = 80%); (c) the reconstruction result (SNR = 40 dB, Sampling ratio = 100%); (d) the reconstruction result (SNR = 20 dB, Sampling ratio = 60%); (e) the reconstruction result (SNR = 20 dB, Sampling ratio = 80%); (f) the reconstruction result (SNR = 20 dB, Sampling ratio = 100%).

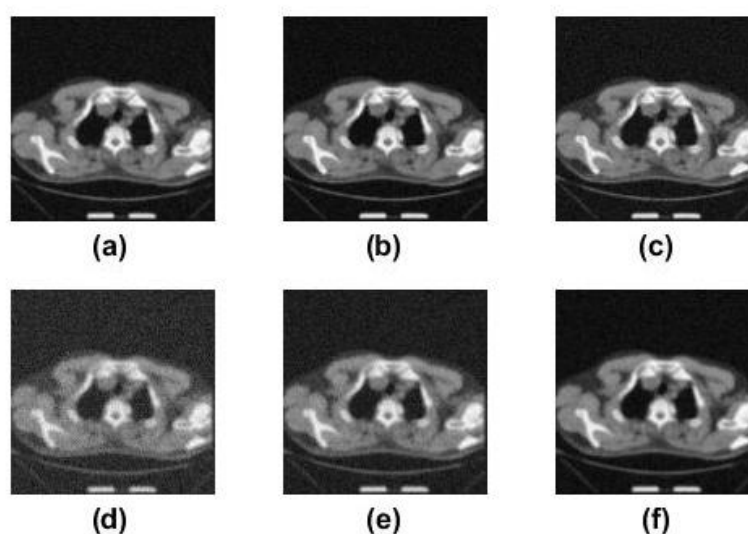

**Figure S3.** Experimental images and results of the third CT image. The 1st row shows the SART method results for 60%, 80% and 100% of measurements, respectively, from left to right (SNR = 40 dB); the 2nd row shows SART method results for 60%, 80% and 100% of measurements, respectively, from left to right (SNR = 20 dB). (a) the reconstruction result (SNR = 40 dB, Sampling ratio = 60%); (b) the reconstruction result (SNR = 40 dB, Sampling ratio = 80%); (c) the reconstruction result (SNR = 40 dB, Sampling ratio = 100%); (d) the reconstruction result (SNR = 20 dB, Sampling ratio = 60%); (e) the reconstruction result (SNR = 20 dB, Sampling ratio = 80%); (f) the reconstruction result (SNR = 20 dB, Sampling ratio = 100%).

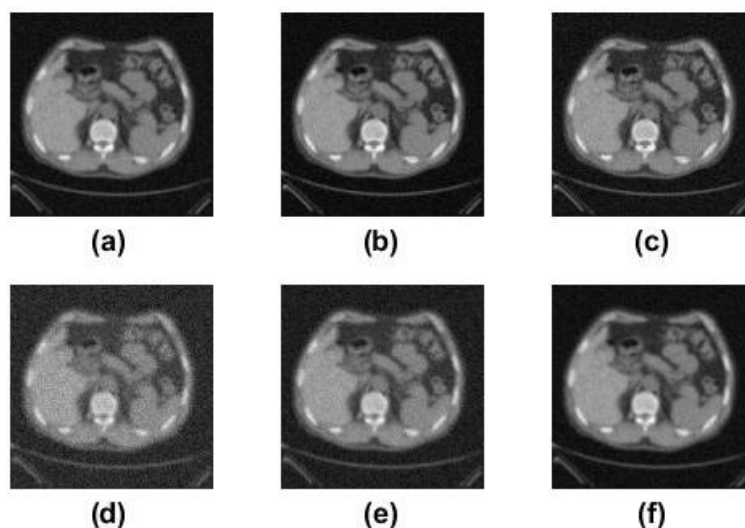

**Figure S4.** Experimental images and results of the fourth CT image. The 1st row shows the SART method results for 60%, 80% and 100% of measurements, respectively, from left to right (SNR = 40 dB); the 2nd row shows SART method results for 60%, 80% and 100% of measurements, respectively, from left to right (SNR = 20 dB). (a) the reconstruction result (SNR=40dB, Sampling ratio=60%); (b) the reconstruction result (SNR = 40 dB, Sampling ratio = 80%); (c) the reconstruction result (SNR = 40 dB, Sampling ratio = 100%); (d) the reconstruction result (SNR = 20dB, Sampling ratio = 60%); (e) the reconstruction result (SNR = 20dB, Sampling ratio = 80%); (f) the reconstruction result (SNR = 20 dB, Sampling ratio = 100%).

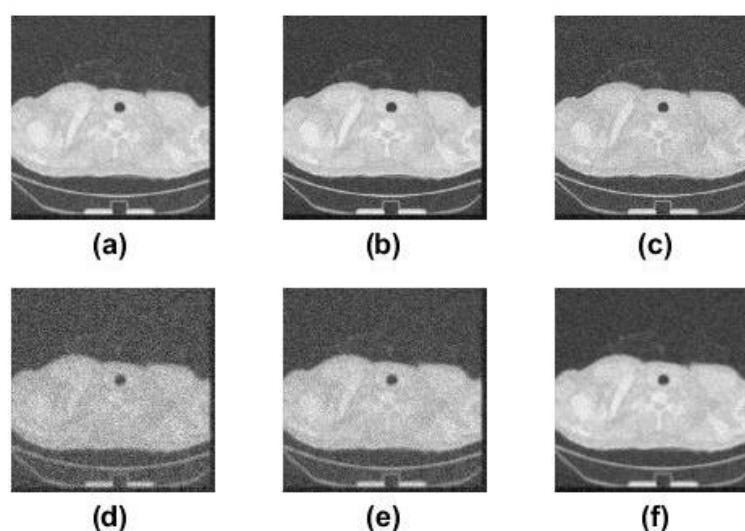

**Figure S5.** Experimental images and results of the first CT image. The 1st row shows the SART+TV method results for 60%, 80% and 100% of measurements, respectively, from left to right (SNR = 40 dB); the 2nd row shows SART + TV method results for 60%, 80% and 100% of measurements, respectively, from left to right (SNR = 20 dB). (a) the reconstruction result (SNR = 40 dB, Sampling ratio = 60%); (b) the reconstruction result (SNR = 40 dB, Sampling ratio = 80%); (c) the reconstruction result (SNR = 40 dB, Sampling ratio = 100%); (d) the reconstruction result (SNR = 20 dB, Sampling ratio=60%); (e) the reconstruction result (SNR = 20 dB, Sampling ratio = 80%); (f) the reconstruction result (SNR = 20 dB, Sampling ratio = 100%).

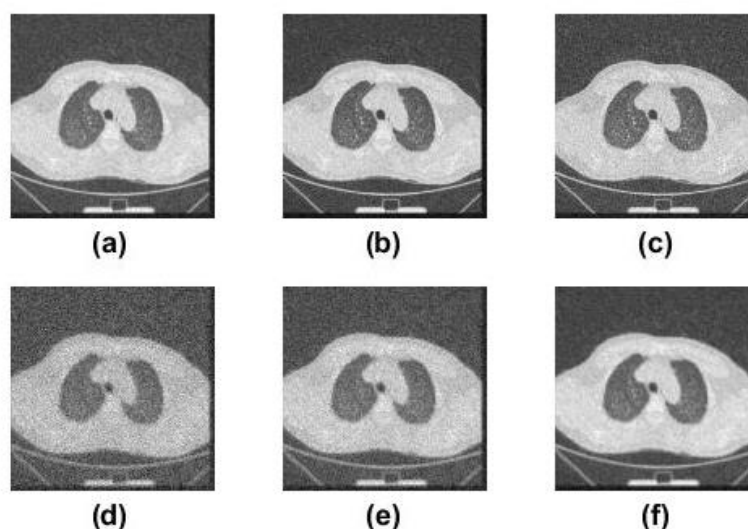

**Figure S6.** Experimental images and results of the second CT image. The 1st row shows the SART + TV method results for 60%, 80% and 100% of measurements, respectively, from left to right (SNR = 40 dB); the 2nd row shows SART + TV method results for 60%, 80% and 100% of measurements, respectively, from left to right (SNR = 20 dB). (a) the reconstruction result (SNR = 40 dB, Sampling ratio = 60%); (b) the reconstruction result (SNR = 40 dB, Sampling ratio = 80%); (c) the reconstruction result (SNR = 40 dB, Sampling ratio = 100%); (d) the reconstruction result (SNR = 20 dB, Sampling ratio=60%); (e) the reconstruction result (SNR = 20dB, Sampling ratio = 80%); (f) the reconstruction result (SNR = 20 dB, Sampling ratio = 100%).

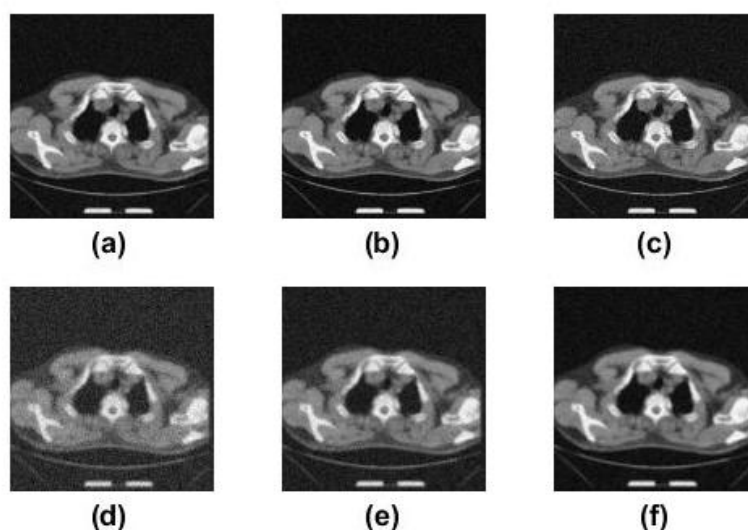

**Figure S7.** Experimental images and results of the third CT image. The 1st row shows the SART + TV method results for 60%, 80% and 100% of measurements, respectively, from left to right (SNR = 40 dB); the 2nd row shows SART + TV method results for 60%, 80% and 100% of measurements, respectively, from left to right (SNR = 20 dB). (a) the reconstruction result (SNR = 40 dB, Sampling ratio = 60%); (b) the reconstruction result (SNR = 40 dB, Sampling ratio = 80%); (c) the reconstruction result (SNR = 40 dB, Sampling ratio = 100%); (d) the reconstruction result (SNR = 20 dB, Sampling ratio = 60%); (e) the reconstruction result (SNR = 20 dB, Sampling ratio = 80%); (f) the reconstruction result (SNR = 20 dB, Sampling ratio = 100%).

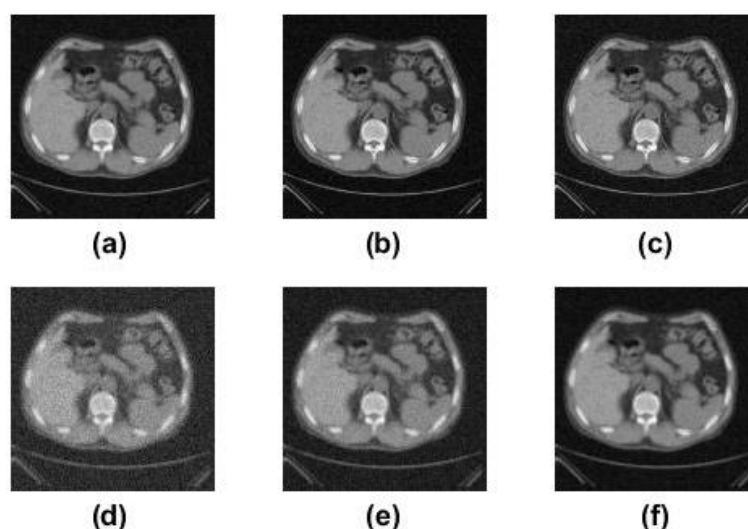

**Figure S8.** Experimental images and results of the fourth CT image. The 1st row shows the SART + TV method results for 60%, 80% and 100% of measurements, respectively, from left to right (SNR = 40 dB); the 2nd row shows SART + TV method results for 60%, 80% and 100% of measurements, respectively, from left to right (SNR = 20 dB). (a) the reconstruction result (SNR = 40 dB, Sampling ratio = 60%); (b) the reconstruction result (SNR = 40 dB, Sampling ratio = 80%); (c) the reconstruction result (SNR = 40 dB, Sampling ratio = 100%); (d) the reconstruction result (SNR = 20 dB, Sampling ratio=60%); (e) the reconstruction result (SNR = 20 dB, Sampling ratio =80%); (f) the reconstruction result (SNR = 20 dB, Sampling ratio = 100%).

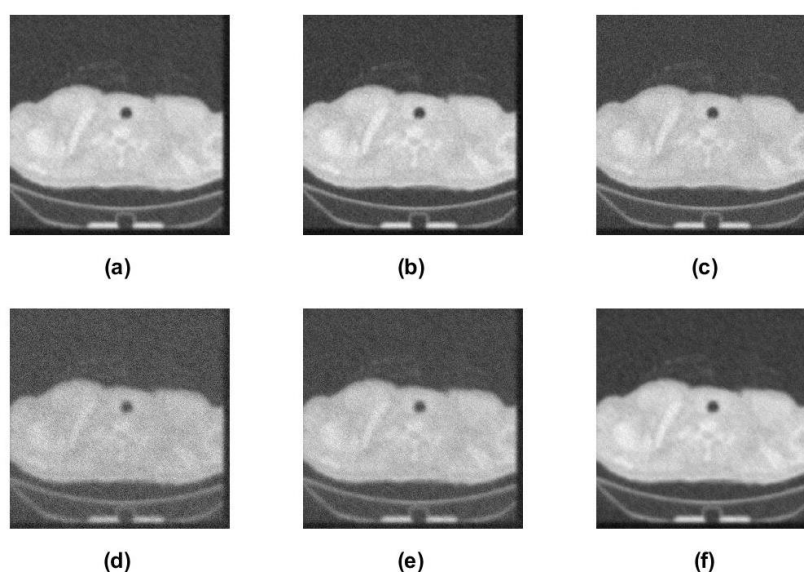

**Figure S9.** Experimental images and results of the first CT image. The 1st row shows the Wavelet method results for 60%, 80% and 100% of measurements, respectively, from left to right (SNR = 40 dB); the 2nd row shows Wavelet method results for 60%, 80% and 100% of measurements, respectively, from left to right (SNR = 20 dB). (a) the reconstruction result (SNR = 40 dB, Sampling ratio = 60%); (b) the reconstruction result (SNR = 40dB, Sampling ratio = 80%); (c) the reconstruction result (SNR = 40dB, Sampling ratio = 100%); (d) the reconstruction result (SNR = 20 dB, Sampling ratio = 60%); (e) the reconstruction result (SNR = 20 dB, Sampling ratio = 80%); (f) the reconstruction result (SNR = 20 dB, Sampling ratio = 100%).

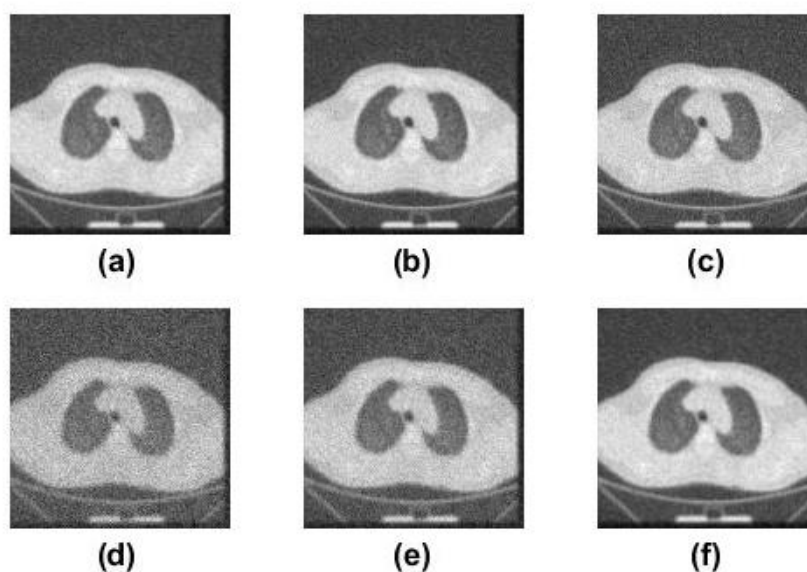

**Figure S10.** Experimental images and results of the second CT image. The 1st row shows the Wavelet method results for 60%, 80% and 100% of measurements, respectively, from left to right (SNR = 40 dB); the 2nd row shows Wavelet method results for 60%, 80% and 100% of measurements, respectively, from left to right (SNR = 20 dB). (a) the reconstruction result (SNR = 40 dB, Sampling ratio = 60%); (b) the reconstruction result (SNR = 40dB, Sampling ratio = 80%); (c) the reconstruction result (SNR = 40 dB, Sampling ratio = 100%); (d) the reconstruction result (SNR = 20 dB, Sampling ratio = 60%); (e) the reconstruction result (SNR = 20 dB, Sampling ratio = 80%); (f) the reconstruction result (SNR = 20 dB, Sampling ratio = 100%).

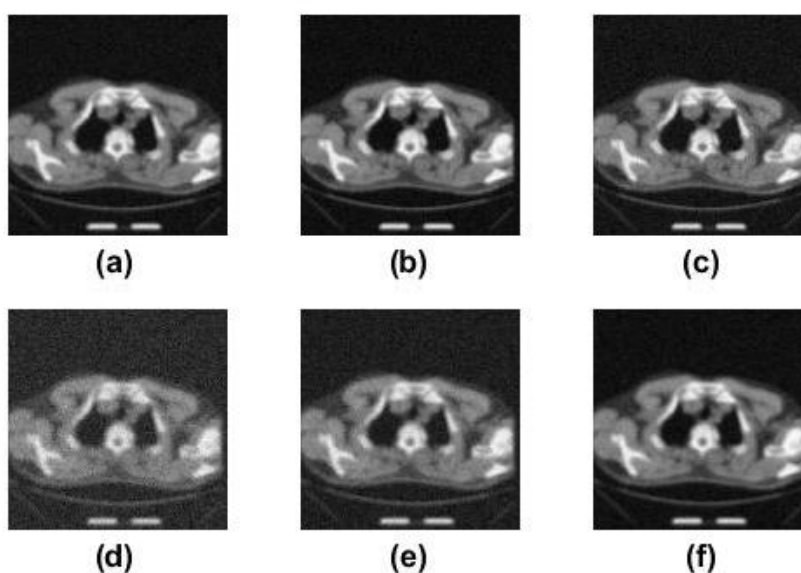

**Figure S11.** Experimental images and results of the third CT image. The 1st row shows the Wavelet method results for 60%, 80% and 100% of measurements, respectively, from left to right (SNR = 40 dB); the 2nd row shows Wavelet method results for 60%, 80% and 100% of measurements, respectively, from left to right (SNR = 20 dB) (a) the reconstruction result (SNR = 40 dB, Sampling ratio = 60%); (b) the reconstruction result (SNR = 40 dB, Sampling ratio = 80%); (c) the reconstruction result (SNR = 40 dB, Sampling ratio = 100%); (d) the reconstruction result (SNR = 20 dB, Sampling ratio = 60%); (e) the reconstruction result (SNR = 20 dB, Sampling ratio = 80%); (f) the reconstruction result (SNR = 20 dB, Sampling ratio = 100%).

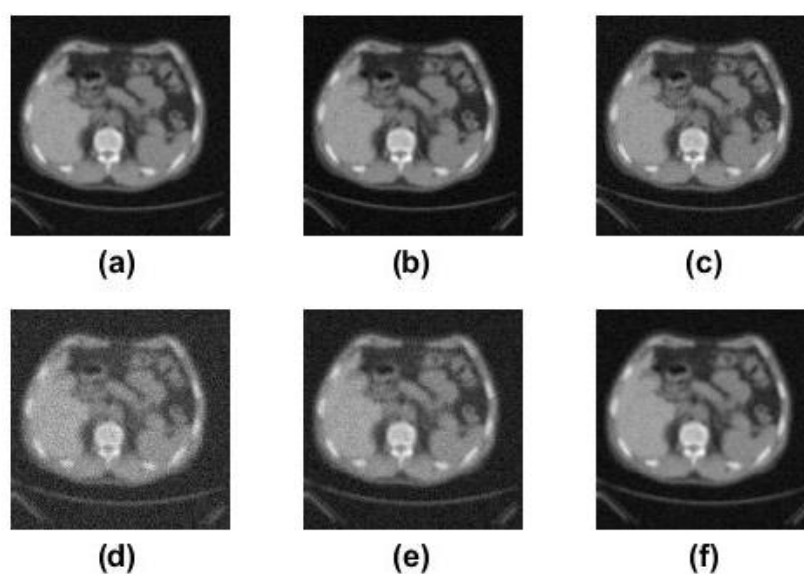

**Figure S12.** Experimental images and results of the fourth CT image. The 1st row shows the Wavelet method results for 60%, 80% and 100% of measurements, respectively, from left to right (SNR = 40 dB); the 2nd row shows Wavelet method results for 60%, 80% and 100% of measurements, respectively, from left to right (SNR = 20 dB). (a) the reconstruction result (SNR = 40 dB, Sampling ratio = 60%); (b) the reconstruction result (SNR = 40 dB, Sampling ratio = 80%); (c) the reconstruction result (SNR = 40 dB, Sampling ratio = 100%); (d) the reconstruction result (SNR = 20 dB, Sampling ratio = 60%); (e) the reconstruction result (SNR = 20 dB, Sampling ratio = 80%); (f) the reconstruction result (SNR = 20 dB, Sampling ratio = 100%).

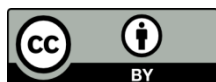

© 2019 by the authors. Submitted for possible open access publication under the terms and conditions of the Creative Commons Attribution (CC BY) license (<http://creativecommons.org/licenses/by/4.0/>).
